# Supplementary material for: Integrated Evaluation of the Multifunctional DPP-IV and ACE Inhibitory Effect of Soybean and Pea Protein Hydrolysates
Source: MDPI journal article supplement (doi:10.3390/nu14122379), 2022-06-08
Supplement: s1 [file s1]

# Integrated evaluation of the multifunctional DPP-IV and ACE inhibitory effect of soybean and pea protein hydrolysates

Carlotta Bollati <sup>1</sup>, Ruoxian Xu<sup>1</sup>, Giovanna Boschin<sup>1</sup>, Martina Bartolomei<sup>1</sup>, Fabrizio Rivardo<sup>2</sup>, Jianqiang Li<sup>1</sup>, Anna Arnoldi<sup>1</sup> and Carmen Lammi<sup>1,\*</sup>

<sup>1</sup> Department of Pharmaceutical Sciences, University of Milan, Via Mangiagalli 25, 20133 Milan (Italy); carlotta.bollati@unimi.it (C.B.), ruoxian.xu@unimi.it (R.X.), giovanna.boschin@unimi.it (G.B.), jianqiang.li@unimi.it (J.L.), anna.arnoldi@unimi.it (A.A.), carmen.lammi@unimi.it (C.L.)

<sup>2</sup> A. Costantino & C. Spa, Via Francesco Romana 11-15 - 10083 Favria (TO) – Italy; frivardo@acostantino.com (F.R.),

\* Correspondence: carmen.lammi@unimi.it; Tel.: +39 02/503019372

**Table S1:** LC-MS/MS based identification of SH and PH peptides.

| Hydrolysate. | Protein name                                  | Peptide sequence                      | Spectrum Intensity |
|--------------|-----------------------------------------------|---------------------------------------|--------------------|
| SH           | Uncharacterized protein                       | (W)FNIVGQWAVTT(S)                     | $5.19 \times 10^7$ |
|              | Ankyrin repeat domain-containing protein 52   | (A)IRSWIVQVMS(Q)                      | $5.11 \times 10^7$ |
|              | Uncharacterized protein                       | (I)GKQASIIEDPRPGQGKN(L)               | $2.34 \times 10^7$ |
|              | Uncharacterized protein                       | (A)GMPVHVSVDLPAPFGDA(G)               | $2.57 \times 10^7$ |
|              | Glycinin G1                                   | (A)VSIIDTNSLENQLDQ(M)                 | $4.56 \times 10^7$ |
|              |                                               | (S)IIDTNSLENQLDQMPR(R)                | $2.07 \times 10^7$ |
|              |                                               | (G)ANSLNLPPEVIQ(H)                    | $2.25 \times 10^7$ |
|              | Hydrolase_4 domain-containing protein         | (A)AAEGGGFSDPAPAPRLAIPEV(P)           | $1.45 \times 10^7$ |
|              | DNA-directed RNA polymerase (Fragment)        | (L)FDIYRVMRPGEPPTMDSAEAMFNA(L)        | $1.48 \times 10^7$ |
|              | Heterokaryon incompatibility protein          | (L)GGLVQPIQMSKSARADGGDVSAQLANLDL S(A) | $1.64 \times 10^7$ |
|              | Uncharacterized protein                       | (Q)HGLGLEVIELGNMVDGFYLSSR(S)          | $4.81 \times 10^7$ |
|              | Phosphatidylinositol-specific phospholipase C | (H)DNDIATALSNLGIFTFSEQ(F)             | $1.15 \times 10^7$ |
|              | Uncharacterized protein                       | (P)LQRIGVGLVFSILAMVSAALI(E)           | $2.57 \times 10^7$ |
|              | Uncharacterized protein                       | (K)HKYVVPPIVIAMATGESG(E)              | $5.83 \times 10^7$ |
|              | C-x8-C-x5-C-x3-H type zinc finger protein     | (N)TAVDRTLADFGRGFGRG(Q)               | $2.12 \times 10^7$ |
|              | PRONE domain-containing protein               | (S)PQVPKSGLS(D)                       | $1.34 \times 10^7$ |
|              | PH domain-containing protein                  | (P)PSISSQSRASSDSSSK(E)                | $9.54 \times 10^6$ |
|              | GMC_OxRdtase_N domain-containing protein      | (N)AGFYSRADADFFARS(G)                 | $2.08 \times 10^7$ |
| PH           | Vicilin                                       | (E)ITPEKNPQLQDLDFVN(S)                | $3.14 \times 10^7$ |
|              |                                               | (E)KNPQLQDLDFVN(S)                    | $5.96 \times 10^7$ |
|              | Vicilin 47k                                   | (F)EITPEKNQQLQDLDFVN(S)               | $2.26 \times 10^7$ |
|              |                                               | (E)KNQQLQDLDFVN(S)                    | $7.09 \times 10^7$ |
|              |                                               | (K)NQQLQDLDFVN(S)                     | $4.01 \times 10^7$ |
|              | Legumin A2                                    | (N)ALEPDNRIE(S)                       | $1.53 \times 10^7$ |
|              |                                               | (S)SVINNLPDVA(A)                      | $4.96 \times 10^7$ |

---

|                                                            |                                                           |                                          |
|------------------------------------------------------------|-----------------------------------------------------------|------------------------------------------|
| Mannonate dehydratase                                      | (T)GATNIVSSLHQVPIGRAWT(E)                                 | $3.28 \times 10^7$                       |
| LysR family transcriptional<br>regulator                   | (K)HLFILGGLGWGGLPASVVKDDL(A)                              | $1.04 \times 10^8$                       |
| Aldehyde dehydrogenase                                     | (T)GATAQWAAINCGLGADILREAA(A)                              | $1.70 \times 10^7$                       |
| Leucine-rich repeat receptor-like<br>protein               | (F)GIDLSNNLLHGEIPRGLFGLAGLE(Y)                            | $3.11 \times 10^7$                       |
| AsmA family protein                                        | (S)GGLSFDRKAAKTTASGGLTLKADA(G)                            | $2.73 \times 10^7$                       |
| TP-binding protein                                         | (I)LFGQAGLDPLPVDVGANGRL(T)<br>(L)DRMFCGIIDRDGGAPGTDRIF(P) | $1.80 \times 10^7$<br>$3.23 \times 10^7$ |
| Putative aromatic<br>aminotransferase protein              | (A)TFIQAAPRIIT(Q)                                         | $3.03 \times 10^7$                       |
| Argonaute 2                                                | (Q)WPCLQVGNPQRPNYLPMEVCKIVEG(Q)                           | $2.95 \times 10^7$                       |
| ABC transporter substrate-<br>binding protein              | (G)WAGAAFGFEESPELKALVDAGKLPPVE(K)                         | $6.51 \times 10^7$                       |
| ABC transporter substrate-<br>binding protein              | (S)GGGTWEAAQKKAFFDPFTRDTGIKVV(L)                          | $5.85 \times 10^7$                       |
| Mannonate dehydratase                                      | (I)RGGKLSFMETFPDEGDMDMVRS(V)                              | $5.80 \times 10^7$                       |
| LysR family transcriptional<br>regulator                   | (K)HLFILGGLGWGGLPASVVKDDL(A)                              | $2.92 \times 10^7$                       |
| Clink                                                      | (F)SQLPEELKEKIMNEHLKEI(K)                                 | $2.79 \times 10^7$                       |
| Peptidoglycan-associated<br>protein                        | (K)KPPNSAGDLGLGTGAGGAATPGSAQDFTV<br>NV(G)                 | $6.60 \times 10^7$                       |
| Sporulation protein                                        | (P)ITPAPQQVA AVSPRPAPVFA(P)                               | $1.82 \times 10^7$                       |
| Dioxygenase RAMOSUS5                                       | (P)KPVPAPAPIPTTDVVIPGRILQPVQPFI(D)                        | $1.36 \times 10^7$                       |
| Putative DNA<br>modification/repair radical SAM<br>protein | (L)NIELPTDSGITRF(A)                                       | $2.14 \times 10^7$                       |
| Hydantoinase/oxoprolinase<br>family protein                | (Y)EGDVLVSTSIGGCNQISDVISKPIQLAK(S)                        | $3.06 \times 10^7$                       |
| Aspartate/tyrosine/aromatic<br>aminotransferase            | (F)IDLAYQGLGDGLEQDAAPARM(V)                               | $1.59 \times 10^7$                       |
| DNA replication licensing factor<br>MCM3                   | (G)THLRGDINMMMVGDPVSAKS(Q)                                | $2.79 \times 10^7$                       |
| L-threonine 3-dehydrogenase                                | (V)PMVVGHEFSGEIAEIGSAVTRY(H)                              | $4.36 \times 10^6$                       |

---

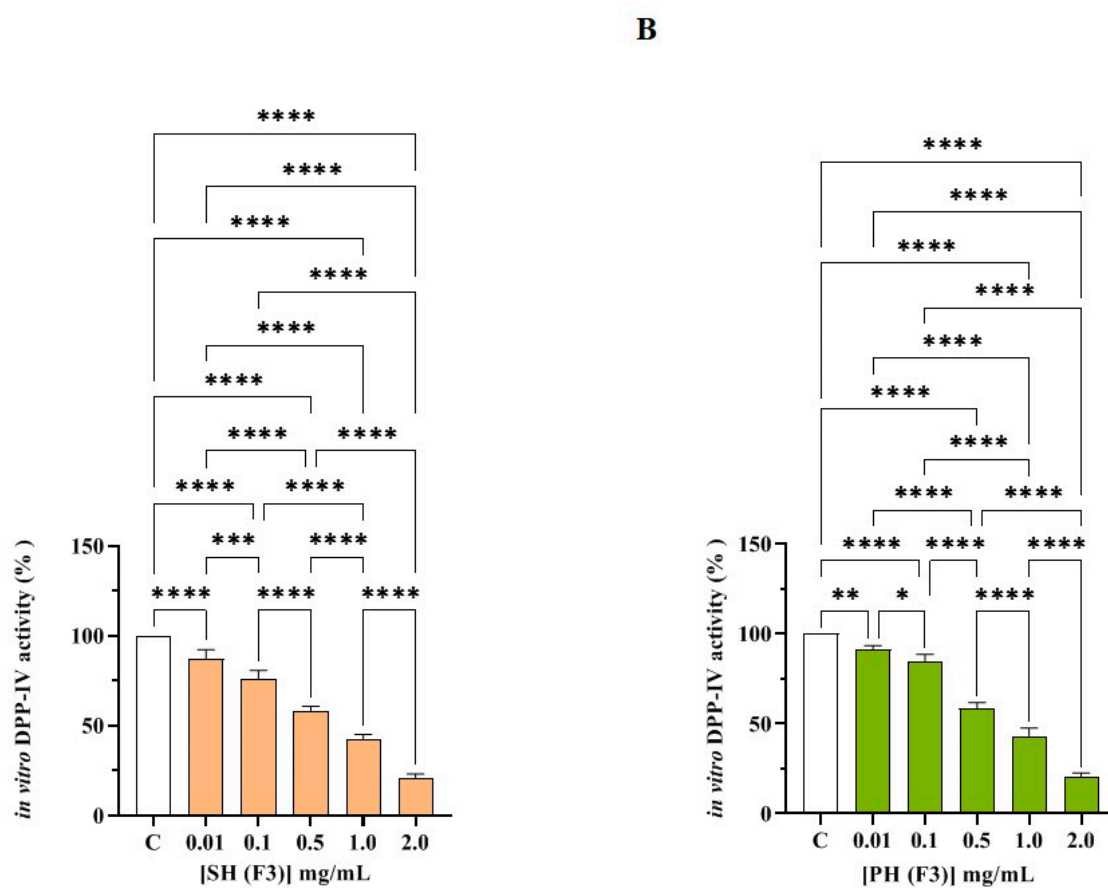

**Figure S1:** Evaluation of the *in vitro* inhibitory effects of SH (F3) (A) and PH (F3) (B) hydrolysates on human recombinant DPP-IV. Bars represent the average  $\pm$  s.d. of three independent experiments in duplicates. \*\*\*\*  $p < 0.0001$ , \*\*\*  $p < 0.001$ , \*\*  $p < 0.01$ , \*  $p < 0.05$  versus control (C) sample (Activity).

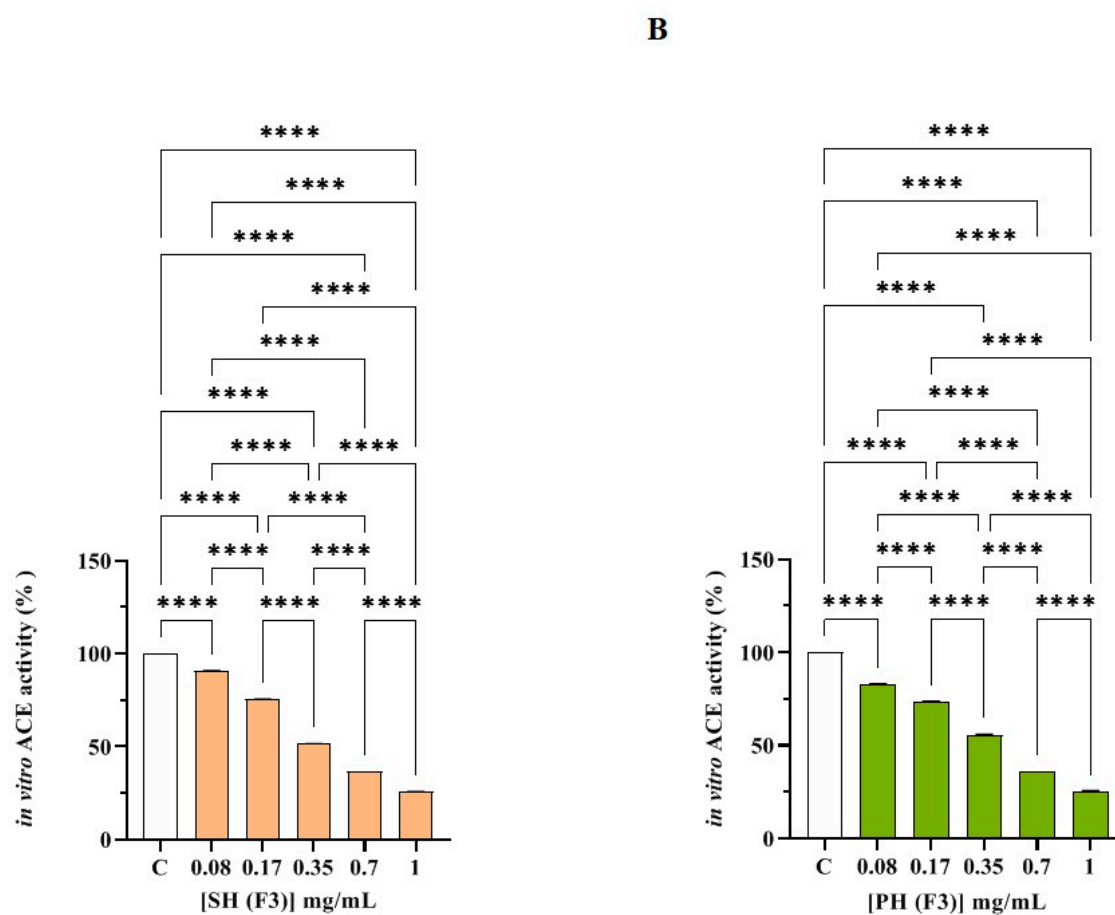

**Figure S2:** Evaluation of the *in vitro* inhibitory effects of SH (F3) (A) and PH (F3) (B) hydrolysates on ACE. Bars represent the means  $\pm$  sd of three independent experiments in duplicate. \*\*\*\*  $p < 0.0001$  versus Control sample (C).

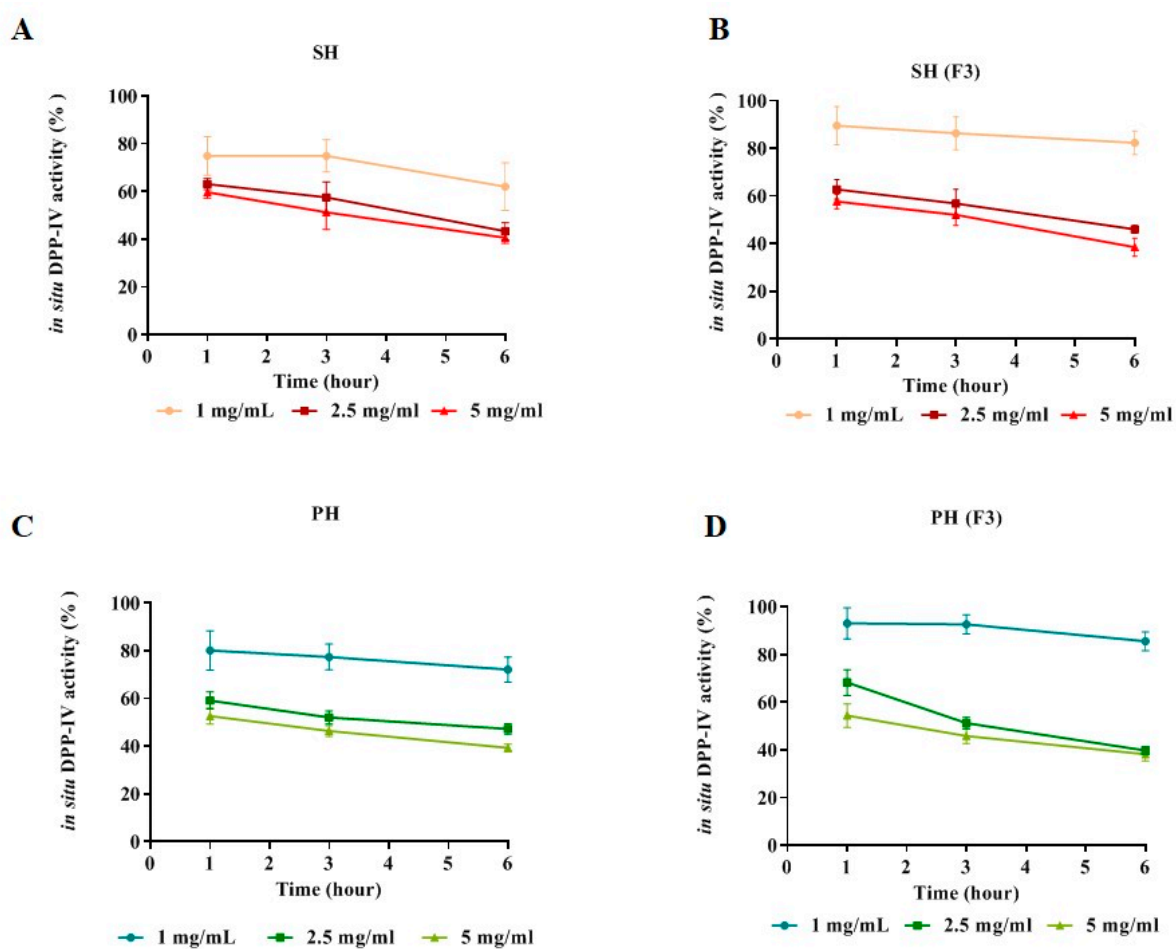

**Figure S3:** The kinetics of the inhibition of cellular DPP-IV activity after incubating Caco-2 cells with the SH (A), SH (F3) (B), PH (C) and PH (F3) (D) hydrolysates for 1, 3 and 6 hours at different concentrations. The data are represented as the means  $\pm$  s.d. of four independent experiments, performed in triplicate.

**A**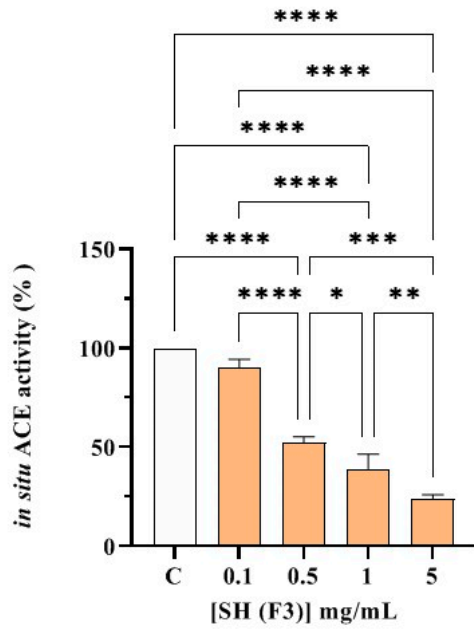**B**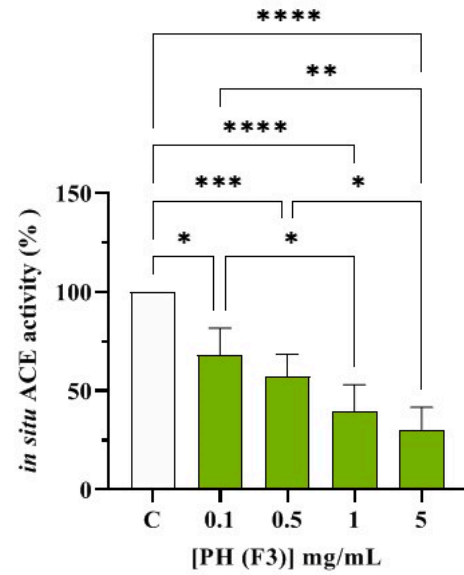

**Figure S4:** Evaluation of the inhibitory effects of SH (F3) (A) and PH (F3) (B) hydrolysates on ACE expressed on Caco-2 cells membranes. Bars represent the SD of three independent experiments in triplicate. \*\*\*\*  $p < 0.0001$ , \*\*\*  $p < 0.001$ , \*\*  $p < 0.01$ , \*  $p < 0.05$  versus Control sample (C), non-significant (ns) is not shown.
